# Supplementary material for: Signals from the brain and olfactory epithelium control shaping of the mammalian nasal capsule cartilage
Source: eLife journal article supplement (doi:10.7554/elife.34465), 2018-06-13

# Interactive PDF with 3D models

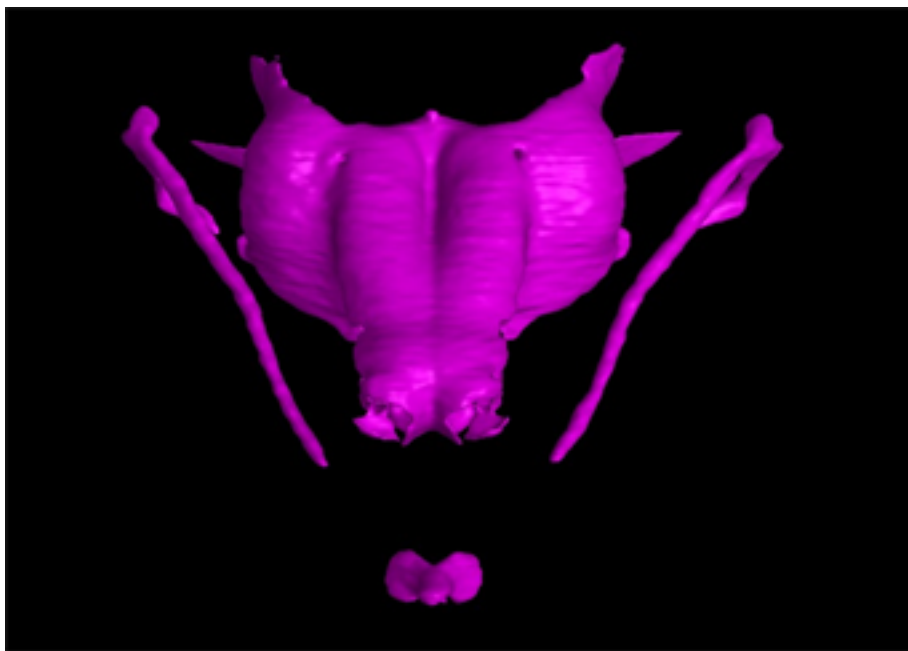

E12.5 control

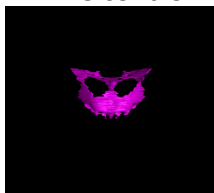

*Nkx2.2-Cre/Shh<sup>floxed/floxed</sup>*

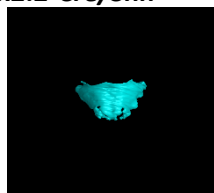

*Six1/Six4* double mutant E12.5

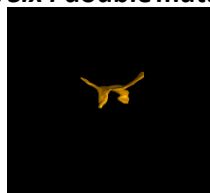

E15.5 control

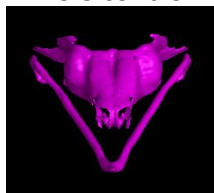

*Nkx2.2-Cre/Shh<sup>floxed/floxed</sup>*

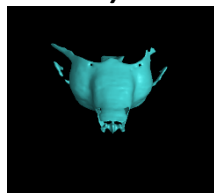

*Shh<sup>Hypo</sup>* E15.5

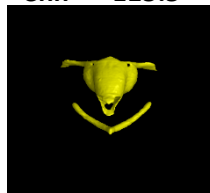

*Col2a1-CreERT2/R26DTA* E15.5

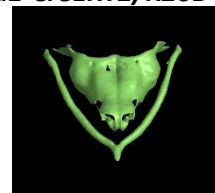

E16.5 control

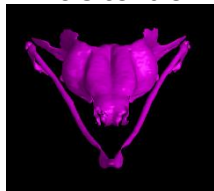

*Asc1* E16.5

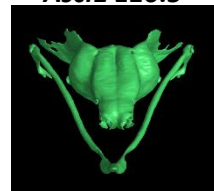

E17.5 control

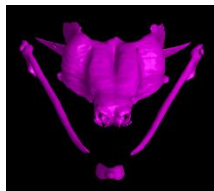

*Shh<sup>Hypo</sup>* E17.5

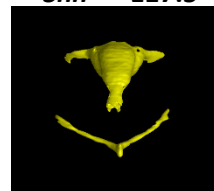

*Col2a1-CreERT2/R26DTA* E17.5

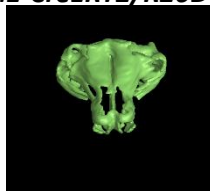

*Inv(-500-C1)* HET

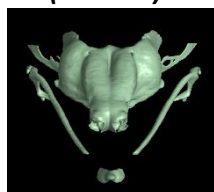

*Inv(-500-C1)* HOM

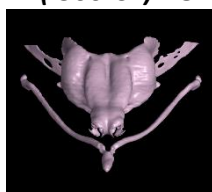

*Del(-90-c2)*

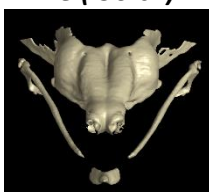

*Inv(6b-c2)*

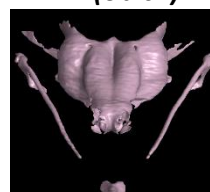

*Del(-90)xInv(6b-c2)*

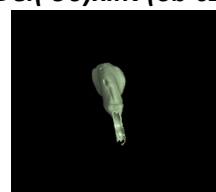

E18.5 control

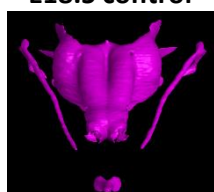

*Six1/Six4* double mutant E18.5

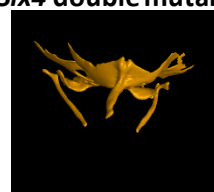

*Six1* <sup>-/-</sup> E18.5

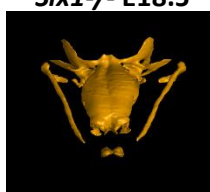

Supplement: supp [file elife_poa_e34465_Figure_3_figure_supplement_1.pdf › elife_poa_e34465_Figure_3_figure_supplement_1.pdf]
