# Supplementary material for: Signals from the brain and olfactory epithelium control shaping of the mammalian nasal capsule cartilage
Source: eLife. 2018 Jun 13;7:e34465. doi: 10.7554/eLife.34465 (PMC6019068; doi:10.7554/eLife.34465)
Supplement: Figure 1—source data 1. [file elife-34465-fig1-data1.xlsx]

## Sheet: DTA (Figure 1R)
cartilage surface [µm2]
DMSO	E15.5 mutant	E17.5 control	E17.5 mutant
2.7593e+07	1.91809e+07	5.19488e+07	34650000
2.57905e+07	1.77902e+07	5.5814e+07
2.59428e+07	1.8309e+07	5.26552e+07
in the entire table only biological Ns are represented
