# Supplementary material for: Signals from the brain and olfactory epithelium control shaping of the mammalian nasal capsule cartilage
Source: eLife. 2018 Jun 13;7:e34465. doi: 10.7554/eLife.34465 (PMC6019068; doi:10.7554/eLife.34465)
Supplement: Figure 6—source data 1. [file elife-34465-fig6-data1.xlsx]

## Sheet: Tabelle1
Volume of cartilage [µM3]
DMSO	E11.5 - E15.5	E12.5 - E15.5	E13.5 - E15.5
140000000000	140000000000	120000000000	150000000000
140000000000	130000000000	130000000000	130000000000
160000000000	130000000000	130000000000	150000000000
180000000000	110000000000	140000000000	130000000000
in the entire table only biological Ns are represented
