# Supplementary material for: Signals from the brain and olfactory epithelium control shaping of the mammalian nasal capsule cartilage
Source: eLife journal article supplement (doi:10.7554/elife.34465), 2018-06-13
Supplement: supp [file elife_poa_e34465_Transparent_Reporting_File.docx]

***eLife’s* transparent reporting form**

We encourage authors to provide detailed information *within their submission* to facilitate the interpretation and replication of experiments. Authors can upload supporting documentation to indicate the use of appropriate reporting guidelines for health-related research (see [EQUATOR Network](http://www.equator-network.org/%20)), life science research (see the [BioSharing Information Resource](https://biosharing.org/)), or the [ARRIVE guidelines](http://www.plosbiology.org/article/info:doi/10.1371/journal.pbio.1000412) for reporting work involving animal research. Where applicable, authors should refer to any relevant reporting standards documents in this form.

If you have any questions, please consult our Journal Policies and/or contact us: [editorial@elifesciences.org](mailto:editorial@elifesciences.org).

**Sample-size estimation**

- You should state whether an appropriate sample size was computed when the study was being designed
- You should state the statistical method of sample size computation and any required assumptions
- If no explicit power analysis was used, you should describe how you decided what sample (replicate) size (number) to use

Please outline where this information can be found within the submission (e.g., sections or figure legends), or explain why this information doesn’t apply to your submission:

Explicit power analysis was not used because all animals demonstrated a strong morphological phenotype following all-or-nothing principle. Because we used extraordinary time consuming and expensive methods for the analysis of individual embryos (micro-CT with following manual segmentation), only few samples per condition (N=3) were analyzed with the use of manual 3D segmentations were necessary, whereas other samples/conditions were analyzed using sections or morphologic whole mount analysis.

**Replicates**

- You should report how often each experiment was performed
- You should include a definition of biological versus technical replication
- The data obtained should be provided and sufficient information should be provided to indicate the number of independent biological and/or technical replicates
- If you encountered any outliers, you should describe how these were handled
- Criteria for exclusion/inclusion of data should be clearly stated
- High-throughput sequence data should be uploaded before submission, with a private link for reviewers provided (these are available from both GEO and ArrayExpress)

Please outline where this information can be found within the submission (e.g., sections or figure legends), or explain why this information doesn’t apply to your submission:

Each experiment was reproduced at least 3 times independently, for every control and phenotype, 3-5 individual embryos (biological replications) were analyzed using a variety of methods. No outliers were excluded from this study.

**Statistical reporting**

- Statistical analysis methods should be described and justified
- Raw data should be presented in figures whenever informative to do so (typically when N per group is less than 10)
- For each experiment, you should identify the statistical tests used, exact values of N, definitions of center, methods of multiple test correction, and dispersion and precision measures (e.g., mean, median, SD, SEM, confidence intervals; and, for the major substantive results, a measure of effect size (e.g., Pearson's r, Cohen's d)
- Report exact p-values wherever possible alongside the summary statistics and 95% confidence intervals. These should be reported for all key questions and not only when the p-value is less than 0.05.

Please outline where this information can be found within the submission (e.g., sections or figure legends), or explain why this information doesn’t apply to your submission:

Quantification approach and statistical analysis methods are described in figure legend for Figure 1 (page 15, unpaired Student t-test, comparison between two groups, N=3, Mean and SD are shown, the exact p value is shown in the figure and the confidence interval is mentioned in the figure legend). Additional quantification descriptions can be found in Materials and Methods section under the heading “Microscopy, volume rendering, image analysis and quantifications”, page 26. We provided the source data files for numerical data corresponding to Figure 1R and Figure 6C.

(For large datasets, or papers with a very large number of statistical tests, you may upload a single table file with tests, Ns, etc., with reference to sections in the manuscript.)

**Group allocation**

- Indicate how samples were allocated into experimental groups (in the case of clinical studies, please specify allocation to treatment method); if randomization was used, please also state if restricted randomization was applied
- Indicate if masking was used during group allocation, data collection and/or data analysis

Please outline where this information can be found within the submission (e.g., sections or figure legends), or explain why this information doesn’t apply to your submission:

The analysis of very few transgenic animals (biological N=3-5) did not require group allocations with randomization since the analyzed phenotypes were so strong and obvious (“all or nothing”) and, thus, could be immediately detected by eye without mistake. All animals were reliably genotyped. We made this statement on page 26. The statistical analysis is done only for one experiments shown in Figure 1.

**Additional data files (“source data”)**

- We encourage you to upload relevant additional data files, such as numerical data that are represented as a graph in a figure, or as a summary table
- Where provided, these should be in the most useful format, and they can be uploaded as “Source data” files linked to a main figure or table
- Include model definition files including the full list of parameters used
- Include code used for data analysis (e.g., R, MatLab)
- Avoid stating that data files are “available upon request”

Please indicate the figures or tables for which source data files have been provided:

We provided the source data files for numerical data corresponding to Figure 1R and Figure 6C.
